# Supplementary material for: Food Pleasure Profiles—An Exploratory Case Study of the Relation between Drivers of Food Pleasure and Lifestyle and Personality Traits in a Danish Consumer Segment
Source: MDPI journal article supplement (doi:10.3390/foods11050718), 2022-02-28
Supplement: s1 [file s1]

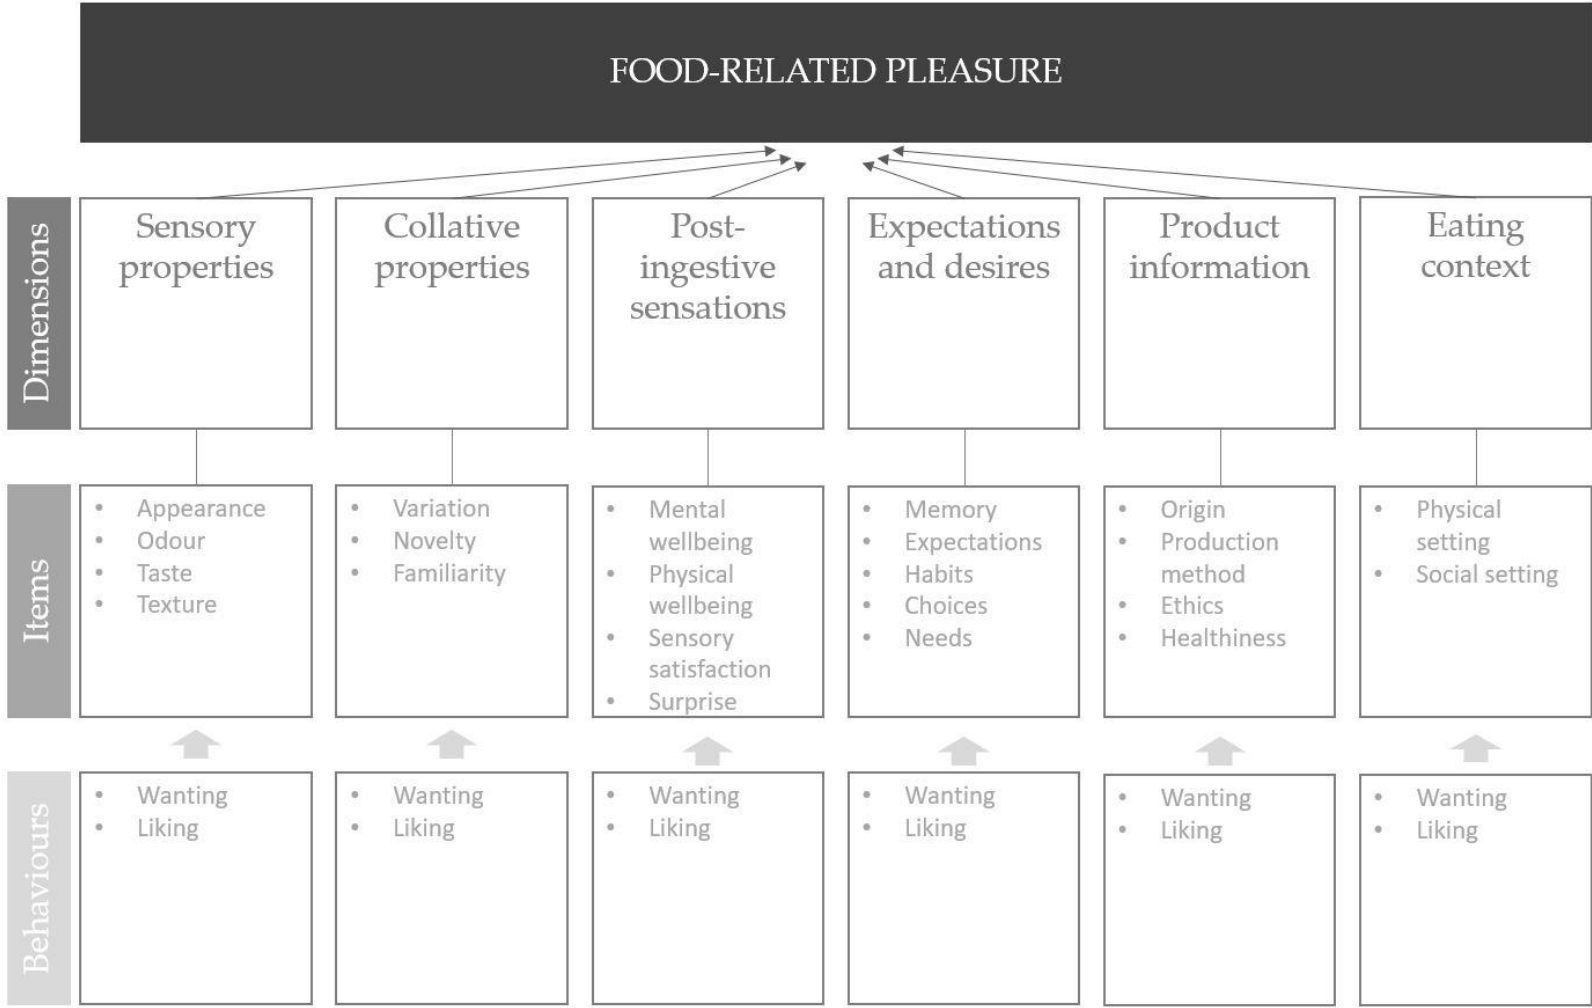

**Figure S1.** Schematic conceptualisation of the key dimensions, items, and behavioural elements involved in the individual food-related pleasure response, allowing a holistic study of quantitative (level of pleasure) and qualitative (drivers of pleasure) aspects of food-related pleasure. The model is kindly borrowed from Andersen, B. V., Chan, R. C. K., & Byrne, D. V. (2021). A Conceptual Framework for Multi-Dimensional Measurements of Food Related Pleasure – The Food Pleasure Scale. *Foods*, 10(9), 2044. <https://doi.org/10.3390/foods10092044>

**Table S1.** Response variables with English and Danish phrasings as used in the questionnaires. Data were collected on a 5-point ordinal scale, where “1”=“Not important at all”, “2”=“Not important”, “3”=“Neither important nor not important”, “4”=“Important” and “5”=“Extremely important”.

|                         | English phrasing                                                                   | Danish Phrasing                                                                                 |
|-------------------------|------------------------------------------------------------------------------------|-------------------------------------------------------------------------------------------------|
| Question for each item  | “How important is the following for your experience of food pleasure when eating?” | “Hvor vigtigt er følgende for din generelle oplevelse af nydelse ved fødevarer, når du spiser?” |
| Item                    |                                                                                    |                                                                                                 |
| Memory                  | “To experience positive memories of food”                                          | “At opleve positive minder om mad”                                                              |
| Need                    | “To experience satisfying a need”                                                  | “At opleve at få tilfredsstillet et behov”                                                      |
| Choice                  | “To experience having choices in the eating situation”                             | “At opleve at have valgmuligheder i spisesituationen”                                           |
| Habit                   | “To be able to maintain a habit”                                                   | “At kunne bibeholde en vane”                                                                    |
| Physical eating setting | “To experience positive physical surroundings”                                     | “At opleve en positiv fysisk ramme”                                                             |
| Eating w. others        | “To experience eating with others”                                                 | “At opleve at spise sammen med andre”                                                           |
| Eating alone            | “To experience eating food when I am alone”                                        | “At opleve at spise mad, når jeg er alene”                                                      |
| Variation               | “To experience food variation”                                                     | “At opleve madvariation”                                                                        |
| Familiarity             | “To experience familiar food”                                                      | “At opleve bekendt mad”                                                                         |
| Novelty                 | “To experience new (unknown) food”                                                 | “At opleve ny (ukendt) mad”                                                                     |
| Food Appearance         | “The appearance of the food”                                                       | “Madens udseende”                                                                               |
| Food Odour              | “The odour of the food”                                                            | “Madens duft”                                                                                   |
| Food Taste              | “The taste / flavour of the food”                                                  | “Madens smag”                                                                                   |
| Food Texture            | “The texture of the food”                                                          | “Madens tekstur”                                                                                |
| Pleased senses          | “To experience a satisfaction of the sense of sight, smell, taste and touch”       | “At opleve en tilfredsstillelse af syns-, lugte-, smags- og fornemmelses-sansen”                |
| Physical sensation      | “To experience a positive physical sensation in the body after eating”             | “At opleve en positiv fysisk fornemmelse i kroppen efter spisning”                              |
| Mental sensation        | “To experience a positive mental feeling / sensation after eating”                 | “At opleve en positiv mental fornemmelse / følelse efter spisning”                              |
| Surprise                | “To experience positive surprises from the meal”                                   | “At opleve positive overraskelser ved maden”                                                    |
| Atmosphere              | “To experience a positive atmosphere”                                              | “At opleve en positiv stemning / atmosfære”                                                     |

**Table S2.** Overview of distributions of all variables by the five segments and the 'Tie on first' subgroup as well as results of Chi  $\chi^2$  / Kruskal-Wallis tests.

|                                        | Total                   | Sensory<br>Pleasure<br>Seekers | Exploratory<br>Pleasure<br>Seekers | Contextual<br>Pleasure<br>Seekers | Confirming<br>Pleasure<br>Seekers | Internal<br>Pleasure<br>Seekers | Tie on first       | Chi X². df.    | p-value |
|----------------------------------------|-------------------------|--------------------------------|------------------------------------|-----------------------------------|-----------------------------------|---------------------------------|--------------------|----------------|---------|
|                                        | N <sub>total</sub> =355 | N=176 (50%)                    | N=46 (13%)                         | N=60 (17%)                        | N=18<br>(5%)                      | N=121 (34%)                     | N=46 (13%)         |                |         |
| Socio-demographic variables            |                         |                                |                                    |                                   |                                   |                                 |                    |                |         |
| Gender, Female/Male                    | 284/71<br>(80%/20%)     | 142/34<br>(81%/19%)            | 35/11<br>(76%/24%)                 | 47/13<br>(78%/22%)                | 11/7<br>(61%/39%)                 | 95/26<br>(79%/21%)              | 33/13<br>(72%/28%) | 3.18, df = 5   | 0.673   |
| Age, mean (±SD)                        | 33.34 ±13.07            | 34.71 (12.85)                  | 29.03 (9.82)                       | 35.16 (13.38)                     | 40.60 (17.50)                     | 32.71 (13.71)                   | 35.04 (12.90)      | 50.04, df = 47 | 0.354*  |
| Educational level                      |                         |                                |                                    |                                   |                                   |                                 |                    | 48.28, df = 35 | 0.067   |
| Primary School                         | 14 (4%)                 | 7 (4%)                         | 3 (7%)                             | 1 (2%)                            | 0 (0%)                            | 5 (4%)                          | 1 (2%)             |                |         |
| High School                            | 115 (32%)               | 47 (27%)                       | 20 (43%)                           | 16 (27%)                          | 7 (39%)                           | 48 (40%)                        | 12 (26%)           |                |         |
| Vocational Education                   | 30 (8%)                 | 20 (11%)                       | 2 (4%)                             | 1 (2%)                            | 3 (17%)                           | 8 (7%)                          | 4 (9%)             |                |         |
| Short Higher Education                 | 30 (8%)                 | 15 (9%)                        | 3 (7%)                             | 6 (10%)                           | 2 (11%)                           | 12 (10%)                        | 7 (15%)            |                |         |
| Medium Higher Education                | 82 (23%)                | 47 (27%)                       | 7 (15%)                            | 16 (27%)                          | 3 (17%)                           | 19 (16%)                        | 7 (15%)            |                |         |
| Long Higher Education                  | 74 (21%)                | 37 (21%)                       | 10 (22%)                           | 17 (28%)                          | 3 (17%)                           | 25 (21%)                        | 14 (30%)           |                |         |
| PhD                                    | 9 (3%)                  | 3 (2%)                         | 0 (0%)                             | 3 (5%)                            | 0 (0%)                            | 4 (3%)                          | 1 (2%)             |                |         |
| Socioeconomic Status                   |                         |                                |                                    |                                   |                                   |                                 |                    | 59.81, df = 25 | <0.001  |
| Student                                | 130 (37%)               | 53 (30%)                       | 18 (49%)                           | 19 (32%)                          | 4 (22%)                           | 52 (43%)                        | 12 (26%)           |                |         |
| Unemployed                             | 24 (7%)                 | 14 (8%)                        | 1 (2%)                             | 4 (7%)                            | 2 (11%)                           | 6 (5%)                          | 2 (4%)             |                |         |
| Employee                               | 164 (46%)               | 95 (54%)                       | 21 (46%)                           | 26 (43%)                          | 6 (33%)                           | 46 (38%)                        | 21 (46%)           |                |         |
| Self-employed                          | 7 (2%)                  | 5 (3%)                         | 2 (4%)                             | 3 (5%)                            | 2 (11%)                           | 5 (4%)                          | 5 (11%)            |                |         |
| Pensioner                              | 14 (4%)                 | 4 (2%)                         | 1 (2%)                             | 6 (10%)                           | 1 (6%)                            | 6 (5%)                          | 4 (9%)             |                |         |
| Other                                  | 16 (5%)                 | 5 (3%)                         | 3 (7%)                             | 2 (3%)                            | 3 (17%)                           | 6 (5%)                          | 2 (4%)             |                |         |
| People in the residency                |                         |                                |                                    |                                   |                                   |                                 |                    | 44.54, df = 55 | 0.842   |
| 1                                      | 64 (18%)                | 26 (15%)                       | 4 (9%)                             | 11 (18%)                          | 4 (22%)                           | 28 (23%)                        | 9 (20%)            |                |         |
| 2                                      | 136 (38%)               | 64 (36%)                       | 24 (52%)                           | 25 (42%)                          | 5 (28%)                           | 41 (34%)                        | 18 (39%)           |                |         |
| 3                                      | 68 (19%)                | 35 (20%)                       | 6 (13%)                            | 10 (17%)                          | 4 (22%)                           | 24 (20%)                        | 7 (15%)            |                |         |
| 4                                      | 55 (15%)                | 36 (20%)                       | 5 (11%)                            | 7 (12%)                           | 2 (11%)                           | 14 (12%)                        | 6 (13%)            |                |         |
| 5 or more                              | 32 (9%)                 | 15 (9%)                        | 7 /(15%)                           | 7 (12%)                           | 3 (17%)                           | 14 (12%)                        | 6 (13%)            |                |         |
| Children in the residency              |                         |                                |                                    |                                   |                                   |                                 |                    | 20.95, df = 20 | 0.400   |
| 0                                      | 259 (70%)               | 112 (64%)                      | 37 (80%)                           | 43 (72%)                          | 12 (67%)                          | 93 (77%)                        | 33 (72%)           |                |         |
| 1                                      | 44 (12%)                | 24 (14%)                       | 3 (7%)                             | 6 (10%)                           | 2 (11%)                           | 14 (12%)                        | 5 (11%)            |                |         |
| 2                                      | 49 (14%)                | 34 (19%)                       | 3 (7%)                             | 7 (12%)                           | 3 (17%)                           | 11 (9%)                         | 6 (13%)            |                |         |
| 3                                      | 8 (2%)                  | 4 (2%)                         | 2 (4%)                             | 3 (5%)                            | 1 (6%)                            | 2 (2%)                          | 1 (2%)             |                |         |
| 4 or more                              | 4 (1%)                  | 2 (1%)                         | 1 (2%)                             | 1 (2%)                            | 0 (0%)                            | 1 (1%)                          | 1 (2%)             |                |         |
| Lifestyle and health related variables |                         |                                |                                    |                                   |                                   |                                 |                    |                |         |

|                                                         |               |               |               |               |               |               |               |                  |        |
|---------------------------------------------------------|---------------|---------------|---------------|---------------|---------------|---------------|---------------|------------------|--------|
| <b>Diet type</b>                                        |               |               |               |               |               |               |               | 42.23, df = 25   | 0.017  |
| Omnivore                                                | 245 (69%)     | 131 (74%)     | 28 (61%)      | 45 (75%)      | 8 (44%)       | 78 (64%)      | 31 (67%)      |                  |        |
| Flexitarian                                             | 53 (15%)      | 18 (10%)      | 10 (22%)      | 11 (18%)      | 7 (39%)       | 18 (15%)      | 9 (20%)       |                  |        |
| Vegetarian                                              | 14 (4%)       | 5 (3%)        | 4(9%)         | 0 (0%)        | 0 (0%)        | 6 (5%)        | 1 (2%)        |                  |        |
| Pescetarian                                             | 20 (6%)       | 13 (7%)       | 3 (7%)        | 2 (3%)        | 1 (6%)        | 8 (7%)        | 3 (7%)        |                  |        |
| Vegan                                                   | 7 (2%)        | 2 (1%)        | 0 (0%)        | 1 (2%)        | 0 (0%)        | 4 (3%)        | 0 (0%)        |                  |        |
| Other                                                   | 16 (5%)       | 7 (4%)        | 1 (2%)        | 0 (0%)        | 2 (11%)       | 7 (6%)        | 2 (4%)        |                  |        |
| <b>BMI, mean (±SD)</b>                                  | 25.03 (±5.57) | 25.00 (±5.27) | 24.43 (±4.81) | 26.35 (±5.97) | 23.85 (±4.44) | 25.44 (±6.45) | 26.57 (±6.54) | 309.21, df = 303 | 0.391* |
| <b>Physical Activity</b>                                |               |               |               |               |               |               |               | 26.25, df = 20   | 0.158  |
| Bedbound                                                | 1 (0%)        | 1 (1%)        | 0 (0%)        | 0 (0%)        | 0 (0%)        | 0 (0%)        | 0 (0%)        |                  |        |
| Very low activity                                       | 18 (5%)       | 10 (6%)       | 1 (2%)        | 3 (5%)        | 1 (6%)        | 4 (3%)        | 1 (2%)        |                  |        |
| Low activity                                            | 115 (32%)     | 61 (35%)      | 12 (26%)      | 19 (32%)      | 2 (11%)       | 33 (27%)      | 11 (24%)      |                  |        |
| Moderate                                                | 164 (46%)     | 79 (45%)      | 25 (54%)      | 30 (50%)      | 6 (33%)       | 55 (45%)      | 23 (50%)      |                  |        |
| High activity                                           | 57 (16%)      | 25 (14%)      | 8 (17%)       | 8 (13%)       | 9 (50%)       | 29 (24%)      | 11 (24%)      |                  |        |
| <b>Smoking</b>                                          |               |               |               |               |               |               |               | 9.58, df = 10    | 0.478  |
| Yes                                                     | 42 (12%)      | 20 (11%)      | 7 (15%)       | 10 (17%)      | 4 (22%)       | 11 (9%)       | 5 (11%)       |                  |        |
| No                                                      | 266 (75%)     | 133 (76%)     | 29 (63%)      | 45 (75%)      | 12 (67%)      | 94 (78%)      | 34 (74%)      |                  |        |
| Prior smoker                                            | 47 (13%)      | 23 (13%)      | 10 (22%)      | 5 (8%)        | 2 (11%)       | 16 (13%)      | 7 (15%)       |                  |        |
| <b>Personality</b>                                      |               |               |               |               |               |               |               |                  |        |
| Extrovert. Median (IQR)                                 | 3 (2-4)       | 3 (2-4)       | 4 (2-4)       | 3 (2-4)       | 2.5 (2-3)     | 3 (2-4)       | 3 (2-4)       | 36.20, df = 20   | 0.015  |
| Introvert. Median (IQR)                                 | 3 (2-4)       | 3 (2-4)       | 2 (.25-3.75)  | 3 (2-4)       | 4 (3-4.75)    | 3 (2-4)       | 3 (2-4)       | 35.29, df = 20   | 0.019  |
| <b>General health, Median (IQR)</b>                     | 3 (3-4)       | 3 (3-4)       | 3 (3-4)       | 3 (3-4)       | 3 (2.25-4)    | 3 (3-4)       | 3.5 (3-4)     | 19.45, df = 20   | 0.493  |
| <b>Eating differently because Health Worries, now</b>   |               |               |               |               |               |               |               | 7.46, df = 5     | 0.189  |
| Yes                                                     | 69 (19%)      | 142 (81%)     | 8 (17%)       | 15 (25%)      | 4 (22%)       | 26 (21%)      | 13 (28%)      |                  |        |
| No                                                      | 283 (80%)     | 32 (18%)      | 37 (80%)      | 45 (75%)      | 13 (72%)      | 94 (78%)      | 31 (67%)      |                  |        |
| No comment                                              | 3 (1%)        | 2 (1%)        | 1 (2%)        | 0 (0%)        | 1 (6%)        | 1 (1%)        | 2 (4%)        |                  |        |
| <b>Eating differently because Health Worries, prior</b> |               |               |               |               |               |               |               | 8.76, df = 5     | 0.119  |
| Yes                                                     | 134 (38%)     | 108 (61%)     | 18 (39%)      | 16 (27%)      | 9 (50%)       | 48 (40%)      | 19 (41%)      |                  |        |
| No                                                      | 217 (61%)     | 67 (38%)      | 27 (59%)      | 44 (73%)      | 8 (44%)       | 71 (59%)      | 26 (57%)      |                  |        |
| No comment                                              | 4 (1%)        | 1 (1%)        | 1 (2%)        | 0 (0%)        | 1 (6%)        | 2 (2%)        | 1 (2%)        |                  |        |
| <b>Alcohol consumption, Median (IQR)</b>                | 2 (2-3)       | 2 (2-3)       | 3 (2-3)       | 2 (2-3)       | 2 (1.25-3)    | 2 (2-3)       | 2 (2-3)       | 23.03, df = 20   | 0.287  |
| Never                                                   | 50 (14%)      | 20 (11%)      | 9 (20%)       | 7 (12%)       | 5 (28%)       | 22 (18%)      | 6 (13%)       |                  |        |
| Rarely                                                  | 148 (42%)     | 73 (41%)      | 12 (26%)      | 27 (45%)      | 7 (39%)       | 54 (45%)      | 20 (43%)      |                  |        |
| Sometimes                                               | 135 (38%)     | 73 (41%)      | 20 (43%)      | 19 (32%)      | 4 (22%)       | 40 (33%)      | 17 (37%)      |                  |        |
| Often                                                   | 17 (5%)       | 9 (5%)        | 5 (11%)       | 5 (8%)        | 2 (11%)       | 3 (2%)        | 3 (7%)        |                  |        |
| Very often                                              | 5 (1%)        | 1 (1%)        | 0 (0%)        | 2 (3%)        | 0 (0%)        | 2 (2%)        | 0 (0%)        |                  |        |
| <b>Addiction treatment, now</b>                         |               |               |               |               |               |               |               | 214.54, df = 5   | <0.001 |

|                                        |            |           |           |           |            |            |           |                |       |
|----------------------------------------|------------|-----------|-----------|-----------|------------|------------|-----------|----------------|-------|
| Yes                                    | 0 (0%)     | 0 (0%)    | 0 (0%)    | 0 (0%)    | 0 (0%)     | 0 (0%)     | 0 (0%)    |                |       |
| No                                     | 354 (100%) | 175 (99%) | 46 (100%) | 60 (100%) | 18 (100%)  | 121 (100%) | 46 (100%) |                |       |
| No comment                             | 1 (0%)     | 1 (1%)    | 0 (0%)    | 0 (0%)    | 0 (0%)     | 0 (0%)     | 0 (0%)    |                |       |
| <b>Addiction treatment, prior</b>      |            |           |           |           |            |            |           | 2.51, df = 5   | 0.776 |
| Yes                                    | 4 (1%)     | 2 (1%)    | 0 (0%)    | 0 (0%)    | 0 (0%)     | 2 (2%)     | 0 (0%)    |                |       |
| No                                     | 350 (99%)  | 173 (98%) | 46 (100%) | 60 (100%) | 18 (100%)  | 119 (98%)  | 46 (100%) |                |       |
| No comment                             | 1 (0%)     | 1 (1%)    | 0 (0%)    | 0 (0%)    | 0 (0%)     | 0 (0%)     | 0 (0%)    |                |       |
| <b>Feeling stressed, Median (IQR)</b>  | 3 (3-4)    | 3 (3-4)   | 3 (3-4)   | 3 (3-4)   | 3 (2.25-4) | 3 (2.75-4) | 3 (3-4)   | 18.92, df = 20 | 0.527 |
| Never                                  | 2 (1%)     | 0 (0%)    | 0 (0%)    | 0 (0%)    | 0 (0%)     | 1 (1%)     | 0 (0%)    |                |       |
| Rarely                                 | 79 (22%)   | 40 (23%)  | 11 (24%)  | 11 (18%)  | 5 (28%)    | 28 (23%)   | 10 (22%)  |                |       |
| Sometimes                              | 151 (43%)  | 88 (50%)  | 17 (37%)  | 25 (42%)  | 5 (28%)    | 45 (37%)   | 20 (43%)  |                |       |
| Often                                  | 91 (26%)   | 35 (20%)  | 12 (26%)  | 19 (32%)  | 5 (28%)    | 37 (31%)   | 12 (26%)  |                |       |
| Very often                             | 31 (9%)    | 13 (7%)   | 6 (13%)   | 5 (8%)    | 3 (17%)    | 8 (7%)     | 4 (9%)    |                |       |
| <b>Stress treatment, now</b>           |            |           |           |           |            |            |           | 3.26, df = 5   | 0.661 |
| Yes                                    | 13 (4%)    | 6 (3%)    | 1 (2%)    | 0 (0%)    | 3 (17%)    | 5 (4%)     | 2 (4%)    |                |       |
| No                                     | 342 (96%)  | 170 (97%) | 45 (98%)  | 60 (100%) | 15 (83%)   | 116 (96%)  | 44 (96%)  |                |       |
| No comment                             | 0 (0%)     | 0 (0%)    | 0 (0%)    | 0 (0%)    | 0 (0%)     | 0 (0%)     | 0 (0%)    |                |       |
| <b>Stress treatment, prior</b>         |            |           |           |           |            |            |           | 5.16, df = 5   | 0.397 |
| Yes                                    | 50 (14%)   | 32 (18%)  | 5 (11%)   | 7 (12%)   | 1 (6%)     | 14 (12%)   | 7 (15%)   |                |       |
| No                                     | 304 (86%)  | 144 (82%) | 41 (89%)  | 53 (88%)  | 17 (94%)   | 106 (87%)  | 39 (85%)  |                |       |
| No comment                             | 1 (0%)     | 0 (0%)    | 0 (0%)    | 0 (0%)    | 0 (0%)     | 1 (1%)     | 0 (0%)    |                |       |
| <b>Feeling depressed, Median (IQR)</b> | 2 (2-3)    | 2 (2-3)   | 2 (2-3)   | 3 (2-3)   | 3 (3-4)    | 3 (2-3)    | 3 (2-3)   | 23.50, df = 20 | 0.265 |
| Never                                  | 48 (14%)   | 24 (14%)  | 8 (17%)   | 10 (17%)  | 1 (6%)     | 19 (16%)   | 1 (2%)    |                |       |
| Rarely                                 | 132 (37%)  | 74 (42%)  | 18 (39%)  | 17 (28%)  | 3 (17%)    | 38 (31%)   | 11 (24%)  |                |       |
| Sometimes                              | 130 (37%)  | 63 (36%)  | 13 (28%)  | 24 (40%)  | 7 (39%)    | 44 (36%)   | 15 (33%)  |                |       |
| Often                                  | 35 (10%)   | 12 (7%)   | 4 (9%)    | 7 (12%)   | 6 (33%)    | 15 (12%)   | 8 (17%)   |                |       |
| Very often                             | 9 (3%)     | 2 (1%)    | 2 (4%)    | 1 (2%)    | 0 (0%)     | 4 (3%)     | 0 (0%)    |                |       |
| No comment                             | 1 (0%)     | 1 (1%)    | 1 (2%)    | 1 (2%)    | 1 (6%)     | 1 (1%)     | 1 (2%)    |                |       |
| <b>Depression treatment, now</b>       |            |           |           |           |            |            |           | 19.24, df = 5  | 0.002 |
| Yes                                    | 17 (5%)    | 7 (4%)    | 2 (4%)    | 1 ((2%)   | 4 (22%)    | 5 (4%)     | 2 (4%)    |                |       |
| No                                     | 335 (94%)  | 167 (95%) | 43 (93%)  | 58 (97%)  | 12 (67%)   | 114 (94%)  | 42 (91%)  |                |       |
| No comment                             | 3 (1%)     | 2 (1%)    | 1 (2%)    | 1 (2%)    | 2 (11%)    | 2 (2%)     | 2 (4%)    |                |       |
| <b>Depression treatment, prior</b>     |            |           |           |           |            |            |           | 10.33, df = 5  | 0.066 |
| Yes                                    | 60 (17%)   | 30 (17%)  | 10 (22%)  | 10 (17%)  | 7 (39%)    | 17 (14%)   | 11 (24%)  |                |       |
| No                                     | 292 (82%)  | 144 (82%) | 35 (76%)  | 49 (82%)  | 9 (50%)    | 102 (84%)  | 33 (72%)  |                |       |
| No comment                             | 3 (1%)     | 2 (1%)    | 1 (2%)    | 1 (2%)    | 2 (11%)    | 2 (2%)     | 2 (4%)    |                |       |
| <b>Eating disorder treatment, now</b>  |            |           |           |           |            |            |           | 10.65, df = 5  | 0.059 |
| Yes                                    | 5 (1%)     | 0 (0%)    | 1 (2%)    | 2 (3%)    | 1 (6%)     | 2 (2%)     | 1 (2%)    |                |       |
| No                                     | 348 (98%)  | 175 (99%) | 45 (98%)  | 57 (95%)  | 16 (89%)   | 118 (98%)  | 44 (96%)  |                |       |

|                                                       |           |           |          |            |            |           |          |                |        |
|-------------------------------------------------------|-----------|-----------|----------|------------|------------|-----------|----------|----------------|--------|
| No comment                                            | 2 (1%)    | 1 (1%)    | 0 (0%)   | 1 (2%)     | 1 (6%)     | 1 (1%)    | 1 (2%)   |                |        |
| <b>Eating disorder treatment, prior</b>               |           |           |          |            |            |           |          | 8.70, df = 5   | 0.122  |
| Yes                                                   | 22 (6%)   | 12 (7%)   | 4 (9%)   | 0 (0%)     | 3 (17%)    | 7 (6%)    | 4 (9%)   |                |        |
| No                                                    | 333 (94%) | 164 (93%) | 42 (91%) | 60 (100%)  | 15 (83%)   | 114 (94%) | 42 (91%) |                |        |
| No comment                                            | 0 (0%)    | 0 (0%)    | 0 (0%)   | 0 (0%)     | 0 (0%)     | 0 (0%)    | 0 (0%)   |                |        |
| <b>Diabetes treatment, Now</b>                        |           |           |          |            |            |           |          | 26.03, df = 10 | 0.004  |
| Yes                                                   | 63 (18%)  | 32 (18%)  | 10 (22%) | 14 (23%)   | 6 (33%)    | 14 (12%)  | 10 (22%) |                |        |
| No                                                    | 291 (82%) | 143 (81%) | 35 (76%) | 45 (75%)   | 11 (61%)   | 106 (88%) | 35 (76%) |                |        |
| No comment                                            | 1 (0%)    | 1 (1%)    | 1 (2%)   | 1 (2%)     | 1 (6%)     | 1 (1%)    | 1 (2%)   |                |        |
| <b>Diabetes treatment, Prior</b>                      |           |           |          |            |            |           |          | 25.82, df = 5  | <0.001 |
| Yes                                                   | 38 (11%)  | 15 (9%)   | 7 (15%)  | 11 (18%)   | 5 (28%)    | 8 (7%)    | 7 (15%)  |                |        |
| No                                                    | 316 (89%) | 160 (91%) | 39 (85%) | 49 (82%)   | 13 (72%)   | 113 (93%) | 39 (85%) |                |        |
| No comment                                            | 1 (0%)    | 1 (1%)    | 0 (0%)   | 0 (0%)     | 0 (0%)     | 0 (0%)    | 0 (0%)   |                |        |
| <b>Appetite and Eating Behaviour variables</b>        |           |           |          |            |            |           |          |                |        |
| <b>Disturbed Taste/odour</b>                          |           |           |          |            |            |           |          | 3.07, df = 5   | 0.690  |
| Yes                                                   | 20 (6%)   | 9 (5%)    | 2 (4%)   | 1 (2%)     | 1 (6%)     | 8 (7%)    | 1 (2%)   |                |        |
| No                                                    | 335 (94%) | 167 (95%) | 44 (96%) | 59 (98%)   | 17 (94%)   | 113 (93%) | 45 (98%) |                |        |
| <b>Disturbed food pleasure</b>                        |           |           |          |            |            |           |          | 5.24, df = 5   | 0.387  |
| Yes                                                   | 53 (15%)  | 20 (11%)  | 8 (17%)  | 8 (13%)    | 4 (22%)    | 19 (16%)  | 5 (11%)  |                |        |
| No                                                    | 302 (85%) | 156 (89%) | 38 (83%) | 52 (87%)   | 14 (78%)   | 102 (84%) | 41 (89%) |                |        |
| <b>General Appetite, Median (IQR)</b>                 | 3 (3-4)   | 3 (2-4)   | 3 (3-4)  | 3 (2-4)    | 3 (3-4)    | 4 (3-4)   | 3 (3-4)  | 75.07, df = 20 | <0.001 |
| Very small                                            | 1 (0%)    | 0 (0%)    | 0 (0%)   | 0 (0%)     | 1 (6%)     | 0 (0%)    | 0 (0%)   |                |        |
| Small                                                 | 26 (7%)   | 14 (8%)   | 7 (15%)  | 3 (5%)     | 3 (17%)    | 5 (4%)    | 3 (7%)   |                |        |
| Regular                                               | 184 (52%) | 102 (58%) | 20 (43%) | 38 (63%)   | 6 (33%)    | 53 (44%)  | 24 (52%) |                |        |
| Large                                                 | 120 (34%) | 49 (28%)  | 16 (35%) | 15 (25%)   | 8 (44%)    | 53 (44%)  | 15 (33%) |                |        |
| Very large                                            | 24 (7%)   | 11 (6%)   | 3 (7%)   | 4 (7%)     | 0 (0%)     | 10 (8%)   | 4 (9%)   |                |        |
| <b>Food tastes...?, Median (IQR)</b>                  | 4 (4-5)   | 4 (4-5)   | 4 (4-5)  | 4 (4-4.25) | 4 (3.25-4) | 4 (4-5)   | 4 (4-5)  | 16.93, df = 10 | 0.076  |
| Very bad                                              | 0 (0%)    | 0 (0%)    | 0 (0%)   | 0 (0%)     | 0 (0%)     | 0 (0%)    | 0 (0%)   |                |        |
| Bad                                                   | 0 (0%)    | 0 (0%)    | 0 (0%)   | 0 (0%)     | 0 (0%)     | 0 (0%)    | 0 (0%)   |                |        |
| Okay                                                  | 31 (9%)   | 11 (6%)   | 7 (15%)  | 8 (13%)    | 5 (28%)    | 12 (10%)  | 6 (13%)  |                |        |
| Good                                                  | 206 (58%) | 102 (58%) | 26 (57%) | 37 (62%)   | 12 (67%)   | 32 (26%)  | 22 (48%) |                |        |
| Very good                                             | 118 (33%) | 63 (36%)  | 13 (28%) | 15 (25%)   | 1 (6%)     | 47 (39%)  | 18 (39%) |                |        |
| <b>Difficulties with feeling hunger, Median (IQR)</b> | 2 (1-3)   | 2 (1-3)   | 2 (2-3)  | 2 (2-2.25) | 2 (2-3)    | 2 (1-2)   | 2 (2-3)  | 20.07, df = 20 | 0.453  |
| Agree very much                                       | 5 (1%)    | 3 (2%)    | 2 (4%)   | 1 (2%)     | 1 (6%)     | 2 (2%)    | 1 (2%)   |                |        |
| Agree                                                 | 35 (10%)  | 17 (10%)  | 9 (20%)  | 6 (10%)    | 8 (44%)    | 8 (7%)    | 4 (9%)   |                |        |
| Neither nor                                           | 51 (14%)  | 28 (16%)  | 8 (17%)  | 8 (13%)    | 4 (22%)    | 16 (13%)  | 8 (17%)  |                |        |
| Do not agree                                          | 150 (42%) | 74 (42%)  | 16 (35%) | 32 (53%)   | 1 (6%)     | 52 (43%)  | 23 (50%) |                |        |
| Do not agree at all                                   | 114 (32%) | 54 (31%)  | 11 (24%) | 13 (22%)   | 4 (22%)    | 43 (36%)  | 10 (22%) |                |        |

|                                                                         |               |               |               |               |               |               |               |                |         |
|-------------------------------------------------------------------------|---------------|---------------|---------------|---------------|---------------|---------------|---------------|----------------|---------|
| <b>Difficulties with describing the feeling of hunger, Median (IQR)</b> | 2 (1-2)       | 2 (1-2)       | 2 (1.25-3)    | 2 (2-3)       | 2 (1.25-2.75) | 2 (1-2)       | 2 (1-3)       | 21.71, df = 20 | 0.357   |
| Agree very much                                                         | 2 (1%)        | 1 (1%)        | 0 (0%)        | 0 (0%)        | 0 (0%)        | 1 (1%)        | 0 (0%)        |                |         |
| Agree                                                                   | 31 (9%)       | 15 (9%)       | 9 (20%)       | 5 (8%)        | 0 (0%)        | 9 (7%)        | 5 (11%)       |                |         |
| Neither nor                                                             | 44 (12%)      | 13 (7%)       | 10 (22%)      | 12 (20%)      | 5 (28%)       | 19 (16%)      | 8 (17%)       |                |         |
| Do not agree                                                            | 161 (45%)     | 79 (45%)      | 15 (33%)      | 33 (55%)      | 8 (44%)       | 51 (42%)      | 18 (39%)      |                |         |
| Do not agree at all                                                     | 117 (33%)     | 68 (39%)      | 12 (26%)      | 10 (17%)      | 5 (28%)       | 41 (34%)      | 15 (33%)      |                |         |
| <b>Food Neophobia Scale, Mean (±SD)</b>                                 | 41.12 (±6.63) | 41.39 (±6.49) | 43.15 (±5.07) | 41.23 (±6.68) | 33.11 (±8.65) | 40.39 (±6.93) | 40.11 (±8.06) | 50.56, df = 31 | 0.015*  |
| <b>Dutch Eating Behavior Questionnaire</b>                              |               |               |               |               |               |               |               |                |         |
| Restricted Eater, Mean (±SD)                                            | 2.85 (±0.80)  | 2.76 (±0.73)  | 2.96 (±0.88)  | 2.95 (±0.71)  | 3.39 (±0.96)  | 2.92 (±0.81)  | 3.06 (±0.76)  | 21.02, df = 20 | 0.396*  |
| Emotional Eater, Mean (±SD)                                             | 2.71 (±1.07)  | 2.59 (±0.99)  | 2.54 (±1.01)  | 2.60 (±1.56)  | 2.72 (±1.09)  | 2.94 (±1.17)  | 2.69 (±1.20)  | 23.78, df = 24 | 0.474*  |
| External Eater, Mean (±SD)                                              | 3.27 (±0.66)  | 3.27 (±0.60)  | 3.17 (±0.53)  | 3.16 (±0.69)  | 2.90 (±0.95)  | 3.41 (±0.72)  | 3.31 (±0.76)  | 22.32, df      | 0.218*  |
| <b>Food pleasure dimensions</b>                                         |               |               |               |               |               |               |               |                |         |
| Sensory-driven Pleasure, Mean (±SD)                                     | 4.12 (±0.59)  | 4.41 (±0.46)  | 3.95 (±0.57)  | 3.94 (±0.63)  | 3.60 (±0.72)  | 3.94 (±0.63)  | 4.20 (±0.72)  | 85.06, df = 14 | <0.001* |
| Exploratory-driven Pleasure, Mean (±SD)                                 | 3.56 (±0.72)  | 3.59 (±0.67)  | 4.26 (±0.55)  | 3.61 (±0.68)  | 2.92 (±0.91)  | 3.49 (±0.70)  | 3.72 (±0.77)  | 14.20, df = 16 | 0.584*  |
| Contextual-driven Pleasure, Mean (±SD)                                  | 3.53 (±0.79)  | 3.52 (±0.76)  | 3.57 (±0.77)  | 4.32 (±0.55)  | 3.09 (±0.87)  | 3.42 (±0.76)  | 3.92 (±0.77)  | 13.06, df = 12 | 0.365*  |
| Confirming-driven Pleasure, Mean (±SD)                                  | 2.62 (±0.82)  | 2.54 (±0.74)  | 2.54 (±0.79)  | 2.59 (±0.82)  | 4.15 (±0.61)  | 2.79 (±0.88)  | 2.96 (±1.01)  | 8.37, df = 12  | 0.756*  |
| Internal-driven Pleasure, Mean (±SD)                                    | 3.86 (±0.71)  | 3.66 (±0.70)  | 3.70 (±0.58)  | 3.76 (±0.62)  | 3.48 (±0.76)  | 4.45 (±0.50)  | 4.15 (±0.74)  | 8.82, df = 10  | 0.550*  |

\*Kruskal-Wallis test

**Table S3.** Overview of ratings of each item (Median (Inter quartile range)) on a 5-point ordinal scale, where “1”=“Not important at all”, “2”=“Not important”, “3”=“Neither important nor not important”, “4”=“Important” and “5”=“Extremely important”.

| Item                  | Median (Inter quartile range) |
|-----------------------|-------------------------------|
| Food appearance       | 4 (3-4)                       |
| Food odour            | 4 (4-5)                       |
| Food taste            | 5 (4-5)                       |
| Food texture          | 4 (3-5)                       |
| Pleased senses        | 4 (3-5)                       |
| Memory                | 4 (3-4)                       |
| Novelty               | 3 (3-4)                       |
| Surprise              | 4 (3-4)                       |
| Variation             | 4 (4-5)                       |
| Eating with others    | 3 (3-4)                       |
| Physical surroundings | 3 (3-4)                       |
| Atmosphere            | 4 (3-5)                       |
| Familiarity           | 3 (2-3)                       |
| Eating alone          | 2 (1.5-3)                     |
| Habit                 | 3 (2-3)                       |
| Physical sensation    | 4 (3-4)                       |
| Mental sensation      | 4 (3-4)                       |
| Need                  | 4 (4-5)                       |





|                                       |                                   |              |                      |       |                     |       |                      |       |                       |       |                      |       |
|---------------------------------------|-----------------------------------|--------------|----------------------|-------|---------------------|-------|----------------------|-------|-----------------------|-------|----------------------|-------|
| <b>1</b>                              | 0.59<br>(0.27-1.26)               | 0.176        | 0.57<br>(0.15-1.78)  | 0.364 | 2.52<br>(1.16-5.57) | 0.020 | 0.95<br>(0.33-2.47)  | 0.912 | 7.41<br>(0.82-168.10) | 0.105 | 1.51<br>(0.28-3.98)  | 0.413 |
| <b>2</b>                              | 1                                 |              | 1                    |       | 1                   |       | 1                    |       | 1                     |       |                      |       |
| <b>3</b>                              | 0.89<br>(0.42-1.88)               | 0.763        | 0.40<br>(0.09-1.35)  | 0.176 | 1.34<br>(0.61-2.91) | 0.464 | 0.52<br>(0.14-1.56)  | 0.276 | NA                    |       | 0.30<br>(0.05-1.17)  | 0.126 |
| <b>4</b>                              | 1.77<br>(0.78-4.21)               | 0.182        | 0.62<br>(0.13-2.13)  | 0.479 | 0.64<br>(0.24-1.56) | 0.345 | 0.29<br>(0.04-1.11)  | 0.112 | NA                    |       | 0.34<br>(0.05-1.34)  | 0.173 |
| <b>5 or more</b>                      | 0.73<br>(0.28-1.84)               | 0.503        | 1.30<br>(0.37-3.98)  | 0.661 | 0.79<br>(0.26-2.16) | 0.660 | 0.75<br>(0.16-2.57)  | 0.668 | NA                    |       | 0.28<br>(0.02-1.57)  | 0.239 |
| <b>Children in the residency</b>      |                                   |              |                      |       |                     |       |                      |       |                       |       |                      |       |
| <b>0</b>                              | 1                                 |              | 1                    |       | 1                   |       | 1                    |       | 1                     |       |                      |       |
| <b>1</b>                              | 1.64<br>(0.72-3.83)               | 0.242        | 0.55<br>(0.08-2.14)  | 0.443 | 2.92<br>(1.16-8.45) | 0.032 | 0.54<br>(0.12-1.74)  | 0.348 | NA                    |       | 0.66<br>(0.14-2.17)  | 0.533 |
| <b>2</b>                              | 3.97<br>(1.65-10.74)              | 0.003        | 0.26<br>(0.01-1.44)  | 0.210 | 2.45<br>(0.77-8.40) | 0.137 | 0.33<br>(0.05-1.25)  | 0.154 | NA                    |       | 0.38<br>(0.06-1.45)  | 0.215 |
| <b>3</b>                              | 1.16<br>(0.21-6.48)               | 0.859        | 1.46<br>(0.07-1.44)  | 0.741 | 0.91<br>(0.04-7.23) | 0.935 | 1.00<br>(0.05-6.67)  | 1.000 | NA                    |       | NA                   |       |
| <b>4 or more</b>                      | 2.36<br>(0.22-51.79)              | 0.859        | 3.79<br>(0.17-44.13) | 0.296 | NA                  |       | 2.28<br>(0.10-25.10) | 0.512 | NA                    |       | 2.90<br>(0.13-32.07) | 0.397 |
| <b>Lifestyle and health variables</b> |                                   |              |                      |       |                     |       |                      |       |                       |       |                      |       |
| <b>Diet type</b>                      |                                   |              |                      |       |                     |       |                      |       |                       |       |                      |       |
| Omnivore                              | 1                                 |              | 1                    |       | 1                   |       | 1                    |       | 1                     |       | 1                    |       |
| Flexitarian                           | 0.51<br>(0.23-1.08)               | 0.082        | 1.61<br>(0.53-4.39)  | 0.374 | 2.06<br>(0.77-5.15) | 0.130 | 5.50<br>(0.62-2.32)  | 0.101 | 1.03<br>(0.46-2.23)   | 0.941 | 1.34<br>(0.41-3.75)  | 0.598 |
| Vegetarian                            | 0.50<br>(0.12-1.75)               | 0.290        | 4.31<br>(1.00-16.66) | 0.037 | NA                  |       | NA                   |       | 1.13<br>(0.28-3.95)   | 0.856 | 0.82<br>(0.04-4.75)  | 0.851 |
| Pescetarian                           | 1.46<br>(0.50-4.58)               | 0.496        | 1.06<br>(0.15-4.51)  | 0.943 | 0.51<br>(0.03-2.88) | 0.524 | NA                   |       | 1.13<br>(0.36-3.31)   | 0.824 | 1.21<br>(0.18-5.05)  | 0.819 |
| Vegan                                 | 0.33<br>(0.05-1.59)               | 0.194        | NA                   |       | 1.15<br>(0.06-7.31) | 0.902 | NA                   |       | 2.64<br>(0.56-13.87)  | 0.217 | NA                   |       |
| Other                                 | 1.51<br>(0.38-7.43)               | 0.571        | 1.23<br>(0.06-7.67)  | 0.854 | 0.80<br>(0.04-4.81) | 0.838 | NA                   |       | 0.60<br>(0.08-2.47)   | 0.494 | 0.91<br>(0.05-2.02)  | 0.932 |
| <b>BMI</b>                            | <b>0.99</b><br><b>(0.94-1.04)</b> | <b>0.774</b> | 0.99<br>(0.90-1.06)  | 0.733 | 0.99<br>(0.91-1.06) | 0.768 | 0.96<br>(0.73-1.13)  | 0.735 | 1.04<br>(0.99-1.10)   | 0.100 | 1.01<br>(0.97-1.10)  | 0.213 |
| <b>Physical Activity</b>              |                                   |              |                      |       |                     |       |                      |       |                       |       |                      |       |
| Bedbound                              | NA                                |              | NA                   |       | NA                  |       | NA                   |       | NA                    |       | NA                   |       |
| Very low activity                     | 1.81<br>(0.51-7.31)               | 0.371        | 0.61<br>(0.03-3.62)  | 0.646 | 0.49<br>(0.03-2.84) | 0.511 | NA                   |       | 0.73<br>(0.15-2.72)   | 0.661 | 0.60<br>(0.03-3.54)  | 0.644 |
| Low activity                          | 1.17                              | 0.590        | 0.79                 | 0.591 | 0.87                | 0.740 | 0.40                 | 0.448 | 0.85                  | 0.599 | 0.68                 | 0.421 |

|                                                     |                      |       |                      |       |                      |       |                       |       |                     |       |                     |       |
|-----------------------------------------------------|----------------------|-------|----------------------|-------|----------------------|-------|-----------------------|-------|---------------------|-------|---------------------|-------|
|                                                     | (0.65-2.11)          |       | (0.32-1.86)          |       | (0.38-1.94)          |       | (0.02-3.42)           |       | (0.45-1.57)         |       | (0.26-1.68)         |       |
| Moderate                                            | 1                    |       | 1                    |       | 1                    |       | 1                     |       | 1                   |       | 1                   |       |
| High activity                                       | 1.25<br>(0.54-2.96)  | 0.605 | 0.48<br>(0.07-1.90)  | 0.360 | 0.13<br>(0.01-1.37)  | 0.059 | 0.49<br>(0.02-5.92)   | 0.619 | 1.74<br>(0.73-4.13) | 0.207 | 0.64<br>(0.13-2.23) | 0.517 |
| Smoking                                             |                      |       |                      |       |                      |       |                       |       |                     |       |                     |       |
| No                                                  | 1                    |       | 1                    |       | 1                    |       | 1                     |       | 1                   |       | 1                   |       |
| Yes                                                 | 1.35<br>(0.58-3.19)  | 0.485 | 0.65<br>(0.10-2.45)  | 0.576 | 2.08<br>(0.70-5.54)  | 0.161 | 3.34<br>(0.15-32.23)  | 0.326 | 0.50<br>(0.17-1.24) | 0.158 | 1.02<br>(0.23-3.28) | 0.981 |
| Prior smoker                                        | 1.17<br>(0.50-2.76)  | 0.723 | 3.41<br>(1.05-10.48) | 0.033 | 0.65<br>(0.14-2.21)  | 0.532 | 1.72<br>(0.07-16.90)  | 0.668 | 0.54<br>(0.19-1.34) | 0.201 | 1.11<br>(0.28-3.49) | 0.873 |
| Personality                                         |                      |       |                      |       |                      |       |                       |       |                     |       |                     |       |
| Extrovert                                           | 1.20<br>(1.96-1.52)  | 0.108 | 1.18<br>(0.84-1.67)  | 0.343 | 1.37<br>(0.98-1.93)  | 0.069 | 0.35<br>(0.10-1.11)   | 0.058 | 0.78<br>(0.61-0.99) | 0.048 | 1.13<br>(0.80-1.61) | 0.500 |
| Introvert                                           | 0.85<br>(0.67-1.07)  | 0.159 | 0.69<br>(0.48-0.97)  | 0.033 | 0.83<br>(0.59-1.15)  | 0.256 | 6.83<br>(1.79-42.79)  | 0.016 | 1.36<br>(1.06-1.76) | 0.016 | 0.96<br>(0.68-1.38) | 0.838 |
| General health                                      | 0.92<br>(0.69-1.23)  | 0.578 | 1.14<br>(0.73-1.81)  | 0.564 | 1.12<br>(0.74-1.70)  | 0.583 | 1.227<br>(0.50-3.39)  | 0.619 | 1.09<br>(0.80-1.48) | 0.578 | 1.21<br>(0.78-1.90) | 0.401 |
| Eating differently because of Health Worries. now   |                      |       |                      |       |                      |       |                       |       |                     |       |                     |       |
| No                                                  | 1                    |       | 1                    |       | 1                    |       | 1                     |       | 1                   |       | 1                   |       |
| Yes                                                 | 1.01<br>(0.50-2.04)  | 0.975 | 1.25<br>(0.39-3.42)  | 0.688 | 1.25<br>(0.45-3.08)  | 0.648 | NA                    |       | 1.32<br>(0.64-2.69) | 0.450 | 1.72<br>(0.61-4.44) | 0.279 |
| Eating differently because of Health Worries. prior |                      |       |                      |       |                      |       |                       |       |                     |       |                     |       |
| No                                                  | 1                    |       | 1                    |       | 1                    |       | 1                     |       | 1                   |       | 1                   |       |
| Yes                                                 | 1.17<br>(0.68-2.04)  | 0.571 | 1.40<br>(0.61-3.20)  | 0.419 | 0.45<br>(0.17-5.85)  | 0.079 | 2.83<br>(0.30-27.38)  | 0.334 | 1.11<br>(0.62-1.96) | 0.720 | 1.32<br>(0.56-3.05) | 0.516 |
| Alcohol consumption                                 |                      |       |                      |       |                      |       |                       |       |                     |       |                     |       |
| Never                                               | 0.63<br>(0.25-1.50)  | 0.306 | 1.79<br>(0.49-5.89)  | 0.348 | 0.74<br>(0.20-2.29)  | 0.628 | 1.39<br>(0.06-16.45)  | 0.799 | 1.33<br>(0.56-3.13) | 0.510 | 0.80<br>(0.17-2.77) | 0.745 |
| Rarely                                              | 1                    |       | 1                    |       | 1                    |       | 1                     |       | 1                   |       | 1                   |       |
| Sometimes                                           | 1.71<br>(0.96-3.09)  | 0.071 | 1.83<br>(0.76-4.62)  | 0.183 | 0.52<br>(0.21-1.23)  | 0.146 | 0.49<br>(0.023-5.39)  | 0.568 | 0.56<br>(0.30-1.04) | 0.068 | 0.84<br>(0.34-2.03) | 0.700 |
| Often                                               | 2.28<br>(0.42-17.23) | 0.359 | NA                   |       | 2.25<br>(0.29-12.87) | 0.380 | 6.89<br>(0.24-104.53) | 0.176 | NA                  |       | 1.32<br>(0.07-9.25) | 0.809 |
| Very often                                          | 0.36<br>(0.02-4.08)  | 0.422 | NA                   |       | NA                   |       | NA                    |       | 4.19<br>(037-96.63) | 0.263 | NA                  |       |
| Addiction treatment. now                            |                      |       |                      |       |                      |       |                       |       |                     |       |                     |       |
| No                                                  | 1                    |       | 1                    |       | 1                    |       | 1                     |       | 1                   |       | 1                   |       |
| Yes                                                 | NA                   |       | NA                   |       | NA                   |       | NA                    |       | NA                  |       | NA                  |       |
| Addiction treatment. prior                          |                      |       |                      |       |                      |       |                       |       |                     |       |                     |       |

|                                |                      |       |                     |       |                      |       |                       |       |                      |       |                      |       |
|--------------------------------|----------------------|-------|---------------------|-------|----------------------|-------|-----------------------|-------|----------------------|-------|----------------------|-------|
| No                             | 1                    |       | 1                   |       | 1                    |       | 1                     |       | 1                    |       | 1                    |       |
| Yes                            | 1.61<br>(0.06-42.74) | 0.743 | NA                  |       | NA                   |       | NA                    |       | 2.40<br>(0.09-64.34) | 0.548 | NA                   |       |
| Feeling stressed               |                      |       |                     |       |                      |       |                       |       |                      |       |                      |       |
| Never                          | NA                   |       | NA                  |       | NA                   |       | NA                    |       | NA                   |       | NA                   |       |
| Rarely                         | 0.64<br>(0.33-1.25)  | 0.189 | 1.44<br>(0.53-3.81) | 0.461 | 0.50<br>(0.17-1.34)  | 0.190 | 0.51<br>(0.02-5.80)   | 0.595 | 1.10<br>(0.53-2.24)  | 0.799 | 0.27<br>(0.06-0.87)  | 0.047 |
| Sometimes                      | 1                    |       | 1                   |       | 1                    |       | 1                     |       | 1                    |       | 1                    |       |
| Often                          | 0.40<br>(0.20-0.79)  | 0.009 | 1.06<br>(0.36-2.93) | 0.909 | 0.76<br>(0.27-.96)   | 0.582 | 1.87<br>(0.08-27.58)  | 0.645 | 1.92<br>(0.97-4.83)  | 0.063 | 0.66<br>(0.22-1.76)  | 0.420 |
| Very often                     | 0.80<br>(0.27-2.43)  | 0.681 | 1.13<br>(0.16-4.94) | 0.884 | 1.32<br>(0.28-4.80)  | 0.698 | 9.02<br>(0.33-186.45) | 0.133 | 0.78<br>(0.20-2.49)  | 0.695 | 1.34<br>(0.28-4.91)  | 0.680 |
| Stress treatment. now          |                      |       |                     |       |                      |       |                       |       |                      |       |                      |       |
| No                             | 1                    |       | 1                   |       | 1                    |       | 1                     |       | 1                    |       | 1                    |       |
| Yes                            | 1.58<br>(0.37-7.91)  | 0.543 | NA                  |       | NA                   |       | NA                    |       | 1.09<br>(0.21-4.61)  | 0.906 | NA                   |       |
| Stress treatment. prior        |                      |       |                     |       |                      |       |                       |       |                      |       |                      |       |
| No                             | 1                    |       | 1                   |       | 1                    |       | 1                     |       | 1                    |       | 1                    |       |
| Yes                            | 2.73<br>(1.18-6.89)  | 0.024 | 0.56<br>(0.09-2.10) | 0.454 | 0.38<br>(0.06-1.42)  | 0.214 | NA                    |       | 0.51<br>(0.19-1.21)  | 0.146 | 0.73<br>(0.16-2.36)  | 0.630 |
| Feeling depressed              |                      |       |                     |       |                      |       |                       |       |                      |       |                      |       |
| Never                          | 0.81<br>(0.37-1.81)  | 0.611 | 2.45<br>(0.85-6.91) | 0.090 | 1.11<br>(0.33-3.30)  | 0.857 | NA                    |       | 1.63<br>(0.70-3.73)  | 0.248 | 3.11<br>(0.98-9.92)  | 0.050 |
| Rarely                         | 1                    |       | 1                   |       | 1                    |       | 1                     |       | 1                    |       | 1                    |       |
| Sometimes                      | 0.99<br>(0.54-1.84)  | 0.984 | 0.59<br>(0.19-1.65) | 0.326 | 1.06<br>(0.42-2.63)  | 0.900 | 0.59<br>(0.03-6.75)   | 0.681 | 1.32<br>(0.68-2.56)  | 0.405 | 1.29<br>(0.42-3.95)  | 0.652 |
| Often                          | 0.53<br>(0.20-1.32)  | 0.180 | 1.24<br>(0.31-4.18) | 0.737 | 1.49<br>(0.38-4.93)  | 0.530 | 8.40<br>(0.82-96.55)  | 0.064 | 2.11<br>(0.82-5.38)  | 0.116 | 4.47<br>(1.28-15.43) | 0.017 |
| Very often                     | 0.29<br>(0.01-2.42)  | 0.296 | NA                  |       | 2.37<br>(0.11-20.59) | 0.473 | NA                    |       | 2.57<br>(0.30-22.50) | 0.358 | NA                   |       |
| Depression treatment. now      |                      |       |                     |       |                      |       |                       |       |                      |       |                      |       |
| No                             | 1                    |       | 1                   |       | 1                    |       | 1                     |       | 1                    |       | 1                    |       |
| Yes                            | 1.43<br>(0.40-5.78)  | 0.587 | 1.82<br>(0.26-7.95) | 0.468 | 0.69<br>(0.04-3.87)  | 0.726 | NA                    |       | 0.48<br>(0.07-1.98)  | 0.360 | 0.88<br>(0.05-4.99)  | 0.904 |
| Depression treatment. prior    |                      |       |                     |       |                      |       |                       |       |                      |       |                      |       |
| No                             | 1                    |       | 1                   |       | 1                    |       | 1                     |       | 1                    |       | 1                    |       |
| Yes                            | 1.04<br>(0.51-2.10)  | 0.922 | 1.91<br>(0.70-4.81) | 0.182 | 1.11<br>(0.39-2.79)  | 0.830 | 5.02<br>(0.52-48.20)  | 0.136 | 0.64<br>(0.28-1.37)  | 0.270 | 1.48<br>(0.50-3.82)  | 0.441 |
| Eating disorder treatment. now |                      |       |                     |       |                      |       |                       |       |                      |       |                      |       |

|                                         |                     |       |                      |       |                     |       |                        |       |                     |       |                      |       |
|-----------------------------------------|---------------------|-------|----------------------|-------|---------------------|-------|------------------------|-------|---------------------|-------|----------------------|-------|
| No                                      | 1                   |       | 1                    |       | 1                   |       | 1                      |       | 1                   |       | 1                    |       |
| Yes                                     | NA                  |       | NA                   |       | NA                  |       | NA                     |       | NA                  |       | NA                   |       |
| Eating disorder treatment. prior        |                     |       |                      |       |                     |       |                        |       |                     |       |                      |       |
| No                                      | 1                   |       | 1                    |       | 1                   |       | 1                      |       | 1                   |       | 1                    |       |
| Yes                                     | 1.57<br>(0.50-5.42) | 0.448 | 1.26<br>(0.18-5.22)  | 0.780 | NA                  |       | 17.75<br>(0.65-487.43) | 0.051 | 1.60<br>(0.62-5.07) | 0.416 | 4.29<br>(1.06-15.10) | 0.028 |
| Diabetes treatment. now                 |                     |       |                      |       |                     |       |                        |       |                     |       |                      |       |
| No                                      | 1                   |       | 1                    |       | 1                   |       | 1                      |       | 1                   |       | 1                    |       |
| Yes                                     | 1.55<br>(0.66-3.77) | 0.320 | 5.68<br>(1.51-21.82) | 0.010 | 0.74<br>(0.19-2.37) | 0.630 | NA                     |       | 0.27<br>(0.08-0.73) | 0.016 | 0.88<br>(0.23-3.02)  | 0.891 |
| Diabetes treatment. prior               |                     |       |                      |       |                     |       |                        |       |                     |       |                      |       |
| No                                      | 1                   |       | 1                    |       | 1                   |       | 1                      |       | 1                   |       | 1                    |       |
| Yes                                     | 1.03<br>(0.38-2.87) | 0.950 | 6.65<br>(1.70-25.74) | 0.005 | 1.13<br>(0.24-3.95) | 0.859 | NA                     |       | 0.32<br>(0.07-1.03) | 0.083 | 1.33<br>(0.28-1.74)  | 0.684 |
| Appetite and eating behaviour variables |                     |       |                      |       |                     |       |                        |       |                     |       |                      |       |
| Disturbed Taste/olfactory sense         |                     |       |                      |       |                     |       |                        |       |                     |       |                      |       |
| No                                      | 1                   |       | 1                    |       | 1                   |       | 1                      |       | 1                   |       | 1                    |       |
| Yes                                     | 1.58<br>(0.45-6.29) | 0.482 | 0.76<br>(0.04-4.44)  | 0.801 | NA                  |       | NA                     |       | 0.76<br>(0.16-2.74) | 0.694 | NA                   |       |
| Disturbed Food Pleasure                 |                     |       |                      |       |                     |       |                        |       |                     |       |                      |       |
| No                                      | 1                   |       | 1                    |       | 1                   |       | 1                      |       | 1                   |       |                      |       |
| Yes                                     | 0.78<br>(0.33-1.82) | 0.561 | 1.62<br>(0.43-4.95)  | 0.426 | NA                  |       | 3.56<br>(0.16-41.18)   | 0.318 | 1.29<br>(0.53-3.03) | 0.559 | 0.58<br>(0.10-10.44) | 0.542 |
| General appetite                        |                     |       |                      |       |                     |       |                        |       |                     |       |                      |       |
| Very small                              | NA                  |       | NA                   |       | NA                  |       | NA                     |       | NA                  |       | NA                   |       |
| Small                                   | 1.09<br>(0.35-3.61) | 0.881 | 0.87<br>(0.12-3.81)  | 0.864 | 0.95<br>(0.14-4.13) | 0.955 | NA                     |       | 0.77<br>(0.16-2.76) | 0.712 | 0.80<br>(0.04-4.93)  | 0.842 |
| Regular                                 | 1                   |       | 1                    |       | 1                   |       | 1                      |       | 1                   |       | 1                    |       |
| Large                                   | 0.55<br>(0.30-1.01) | 0.055 | 0.96<br>(0.39-2.30)  | 0.926 | 0.63<br>(0.24-1.53) | 0.319 | 10.96<br>(1.32-251.10) | 0.053 | 2.14<br>(1.14-4.07) | 0.019 | 1.44<br>(0.55-3.71)  | 0.449 |
| Very large                              | 0.52<br>(0.19-1.39) | 0.195 | 0.82<br>(0.12-3.39)  | 0.810 | 0.97<br>(0.21-3.30) | 0.963 | NA                     |       | 3.23<br>(1.19-8.89) | 0.021 | 2.41<br>(0.61-8.04)  | 0.171 |
| Food tastes....?                        |                     |       |                      |       |                     |       |                        |       |                     |       |                      |       |
| Very bad                                | NA                  |       | NA                   |       | NA                  |       | NA                     |       | NA                  |       | NA                   |       |
| Bad                                     | NA                  |       | NA                   |       | NA                  |       | NA                     |       | NA                  |       | NA                   |       |
| Okay                                    | 0.63<br>(0.18-2.10) | 0.456 | 1.52<br>(0.22-6.67)  | 0.617 | 1.05<br>(0.15-4.40) | 0.955 | 2.58<br>(0.12-22.32)   | 0.440 | 1.20<br>(0.31-4.07) | 0.776 | 1.83<br>(0.16-8.01)  | 0.468 |
| Good                                    | 1                   |       | 1                    |       | 1                   |       | 1                      |       | 1                   |       | 1                    |       |

|                                                           |                        |        |                       |        |                       |        |                         |       |                        |        |                     |       |
|-----------------------------------------------------------|------------------------|--------|-----------------------|--------|-----------------------|--------|-------------------------|-------|------------------------|--------|---------------------|-------|
| Very good                                                 | 1.07<br>(0.62-1.87)    | 0.806  | 0.86<br>(0.35-1.99)   | 0.723  | 0.70<br>(0.29-1.58)   | 0.404  | NA                      |       | 1.55<br>(0.87-2.76)    | 0.136  | 1.64<br>(0.70-3.84) | 0.248 |
| <b>Difficulties with feeling hunger</b>                   | 1.06<br>(0.81-1.37)    | 0.682  | 1.33<br>(0.91-1.91)   | 0.133  | 1.21<br>(0.85-1.71)   | 0.277  | 0.68<br>(0.17-1.74)     | 0.495 | 0.77<br>(0.57-1.02)    | 0.073  | 1.03<br>(0.68-1.50) | 0.892 |
| <b>Difficulties with describing the feeling of hunger</b> | 0.77<br>(0.57-1.03)    | 0.088  | 1.27<br>(0.84-1.88)   | 0.243  | 1.38<br>(0.93-2.02)   | 0.099  | 1.24<br>(0.47-2.81)     | 0.622 | 0.97<br>(0.71-1.31)    | 0.851  | 1.16<br>(0.75-1.76) | 0.485 |
| <b>Food Neophobia Scale</b>                               | 1.02<br>(0.97-10.7)    | 0.391  | 1.05<br>(0.97-1.14)   | 0.217  | 1.05<br>(0.98-1.13)   | 0.205  | 0.82<br>(0.69-0.94)     | 0.007 | 0.97<br>(0.92-1.02)    | 0.188  | 1.02<br>(0.95-1.10) | 0.672 |
| <b>Dutch Eating Behaviour Questionnaire</b>               |                        |        |                       |        |                       |        |                         |       |                        |        |                     |       |
| Restricted Eater                                          | 0.87<br>(0.62-1.22)    | 0.429  | 1.06<br>(0.64-1.75)   | 0.832  | 1.01<br>(0.61-1.64)   | 0.981  | 4.44<br>(1.37-17.94)    | 0.019 | 1.04<br>(0.73-1.49)    | 0.821  | 1.21<br>(0.72-2.06) | 0.471 |
| Emotional Eater                                           | 0.81<br>(0.62-1.04)    | 0.101  | 0.88<br>(0.59-1.31)   | 0.538  | 1.00<br>(0.68-1.46)   | 0.999  | 1.42<br>(0.52-4.07)     | 0.488 | 1.37<br>(1.04-1.81)    | 0.025  | 1.13<br>(0.76-1.69) | 0.534 |
| External Eater                                            | 0.80<br>(0.53-1.21)    | 0.296  | 0.72<br>(0.37-1.39)   | 0.335  | 1.11<br>(0.61-2.01)   | 0.729  | 1.40<br>(0.35-6.03)     | 0.638 | 1.64<br>(1.06-2.59)    | 0.030  | 1.55<br>(0.82-2.93) | 0.176 |
| <b>Food pleasure dimensions</b>                           |                        |        |                       |        |                       |        |                         |       |                        |        |                     |       |
| Sensory Pleasure                                          | 23.60<br>(10.77-57.56) | <0.001 | 0.42<br>(0.20-0.87)   | 0.022  | 0.46<br>(0.22-0.93)   | 0.031  | 0.14<br>(0.02-0.84)     | 0.039 | 0.29<br>(0.16-0.50)    | <0.001 | 1.34<br>(0.71-3.45) | 0.294 |
| Exploratory Pleasure                                      | 1.22<br>(0.82-1.84)    | 0.333  | 15.94<br>(5.82-52.39) | <0.001 | 1.39<br>(0.77-2.63)   | 0.290  | 0.29<br>(0.08-0.93)     | 0.034 | 0.50<br>(0.32-0.77)    | 0.002  | 1.97<br>(1.00-4.15) | 0.062 |
| Contextual Pleasure                                       | 1.24<br>(0.88-1.76)    | 0.229  | 0.92<br>(0.56-1.52)   | 0.728  | 20.27<br>(7.86-63.33) | <0.001 | 0.55<br>(0.17-1.78)     | 0.312 | 0.56<br>(0.38-0.81)    | 0.003  | 2.34<br>(1.29-4.52) | 0.008 |
| Confirming Pleasure                                       | 0.80<br>(0.56-1.14)    | 0.216  | 0.79<br>(0.45-1.36)   | 0.408  | 0.76<br>(0.45-1.26)   | 0.299  | 67.33<br>(8.21-2191.70) | 0.002 | 1.52<br>(1.05-2.22)    | 0.027  | 1.49<br>(0.88-2.52) | 0.136 |
| Internal Pleasure                                         | 0.41<br>(0.26-0.62)    | <0.001 | 0.52<br>(0.29-0.92)   | 0.025  | 0.61<br>(0.35-1.04)   | 0.069  | 0.68<br>(0.18-2.76)     | 0.570 | 27.63<br>(12.55-69.00) | <0.001 | 1.81<br>(0.98-3.50) | 0.065 |
